# Supplementary material
Source: publisher site journal article supplement (https://www.dovepress.com/article/534626)
Supplement: Supplementary file 1 [file Supplementary%20materials.docx]

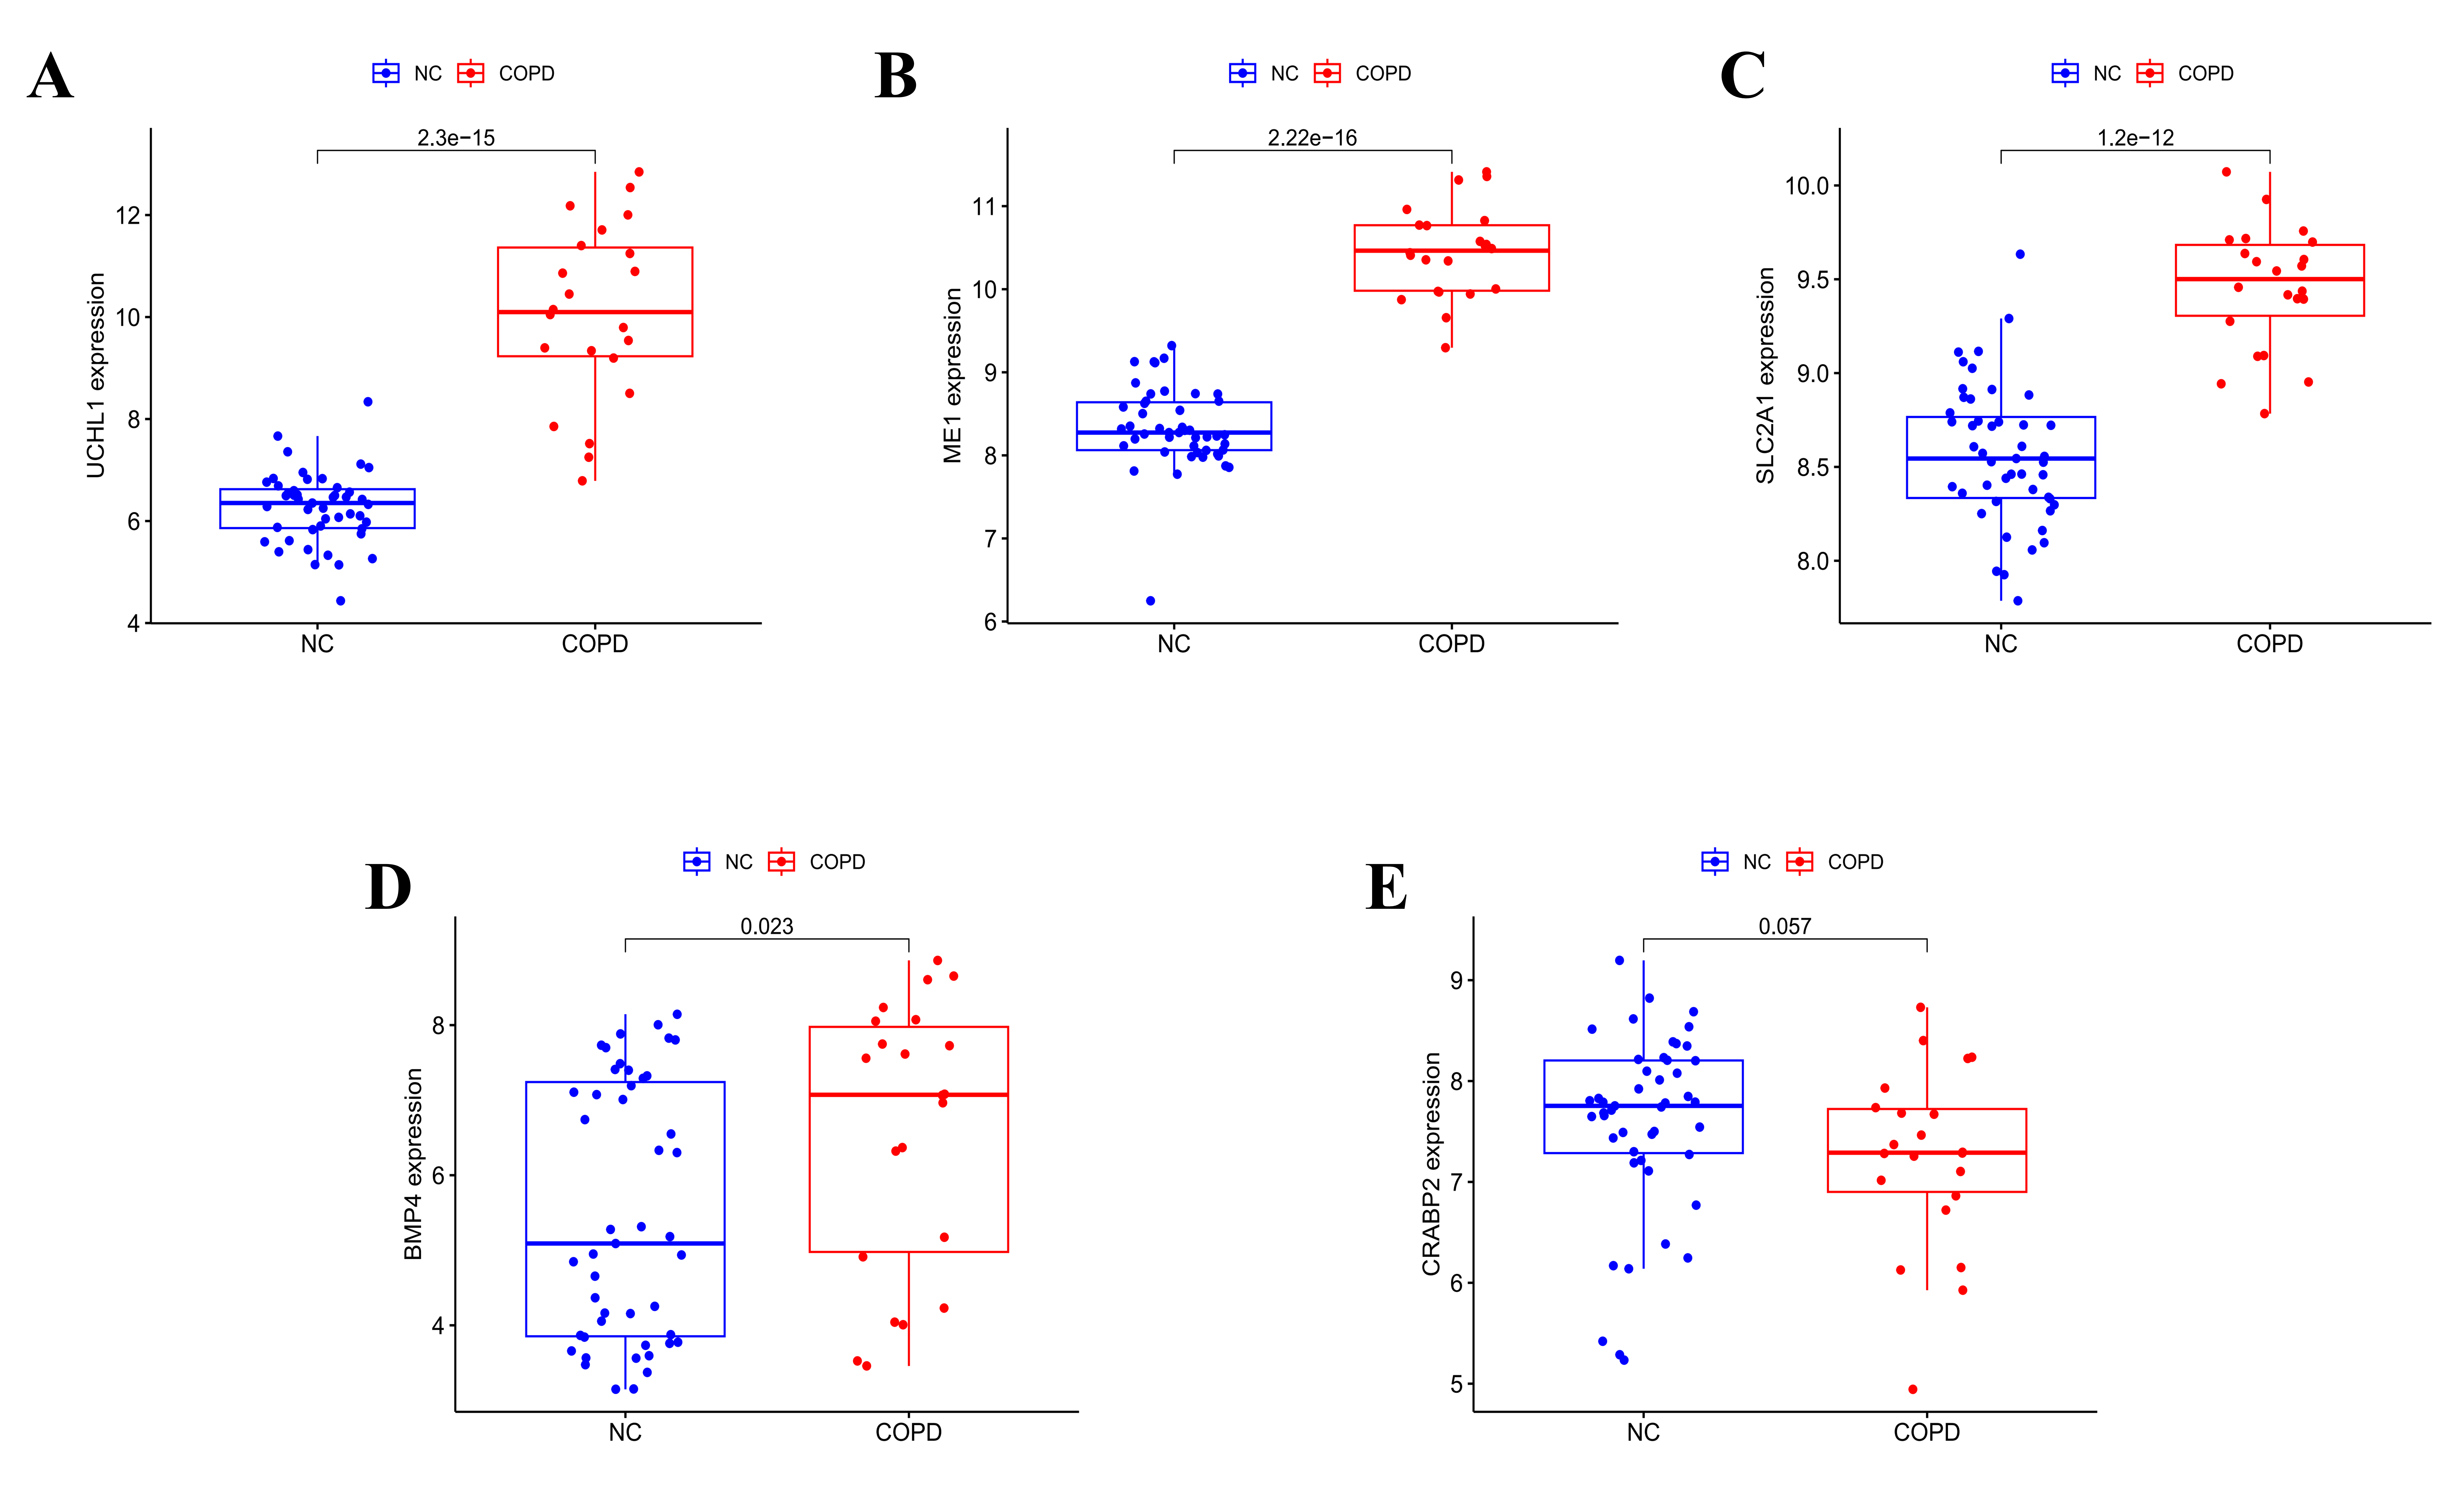
 Figure S1. Validation of the expression levels of the core hub genes in an external dataset. (A-E) Expression levels of UCHL1, ME1, SLC2A1, BMP4, and CRABP2 in the GSE19407 dataset. **P* < 0.05, ***P* < 0.01, ****P* < 0.001, *****P* < 0.0001.





Figure S2. GSEA of each core hub gene based on the "KEGG pathway" gene set. (A) GSEA of UCHL1. (B) GSEA of ME1. (C) GSEA of SLC2A1. (D) GSEA of BMP4. (E) GSEA of CRABP2.
